# Supplementary material for: Evaluation of Cytokines as Robust Diagnostic Biomarkers for COVID-19 Detection
Source: MDPI journal article supplement (doi:10.3390/jpm11070681), 2021-07-20
Supplement: s1 [file s1]

| Cytokine      | Control<br>N = 28 |        | Cases<br>N = 108 |         | <i>p</i> |
|---------------|-------------------|--------|------------------|---------|----------|
|               | Median            | IQR    | Median           | IQR     |          |
| BDNF          | 39.01             | 115.95 | 58.67            | 132.52  | 0.024    |
| EGF           | 3.78              | 1.48   | 2.15             | 7.4     | 0.171    |
| Eotaxin       | 23.82             | 12.66  | 13.85            | 9.6     | <0.001   |
| GMCSF         | 15.07             | 6.19   | 11.38            | 25.39   | 0.733    |
| GRO $\alpha$  | 4.26              | 1.83   | 2.99             | 4.17    | 0.190    |
| HGF           | 71.45             | 53.6   | 163.75           | 251.66  | <0.001   |
| IFN $\alpha$  | 0.74              | 0.37   | 0.48             | 1.63    | 0.499    |
| IFN $\gamma$  | 12.56             | 3.4    | 8.81             | 6.7     | 0.005    |
| IL-1 $\alpha$ | 0.58              | 0.56   | 2.5              | 7.76    | 0.012    |
| IL-1 $\beta$  | 2.49              | 0.96   | 6.62             | 10.47   | <0.001   |
| IL-10         | 1.81              | 0.5    | 1.69             | 2.54    | 0.611    |
| IL-13         | 3.17              | 1.5    | 2.06             | 2.86    | 0.093    |
| IL-15         | 4.41              | 2.96   | 13.32            | 17.99   | <0.001   |
| IL-17A        | 2.03              | 0.61   | 7.03             | 14.73   | <0.001   |
| IL-18         | 14.53             | 18.43  | 47.2             | 51.74   | <0.001   |
| IL-1RA        | 72.51             | 38.73  | 604.75           | 1007.92 | <0.001   |
| IL-2          | 7.59              | 1.61   | 13.39            | 19.64   | <0.001   |
| IL-22         | 18.15             | 22.33  | 3.57             | 20.89   | 0.015    |
| IL-27         | 38.87             | 18.2   | 18.06            | 34.08   | 0.023    |
| IL-4          | 10.37             | 4.52   | 5.59             | 6.98    | 0.04     |
| IL-5          | 9.42              | 4.88   | 5.12             | 17.34   | 0.394    |
| IL-6          | 8.69              | 3.56   | 13.07            | 22.73   | 0.01     |
| IL-7          | 0.72              | 0.31   | 1.67             | 2.88    | <0.001   |
| IL-8          | 3.25              | 1.69   | 2                | 3.81    | 0.079    |
| IP1b          | 29.95             | 22.42  | 48.6             | 44.16   | 0.007    |
| IP-10         | 5.56              | 4.2    | 45.67            | 40.46   | <0.001   |
| LIF           | 12.18             | 2.46   | 14.9             | 16.81   | 0.105    |

| Cytokine     | Control<br>N = 28 |        | Cases<br>N = 108 |        | <i>p</i> |
|--------------|-------------------|--------|------------------|--------|----------|
|              | Median            | IQR    | Median           | IQR    |          |
| MCP1         | 16.78             | 14.57  | 37.88            | 31.55  | <0.001   |
| MIP1a        | 2.91              | 1.12   | 3.39             | 11.38  | 0.607    |
| PDGF-BB      | 31.8              | 39.64  | 303.42           | 656.93 | <0.001   |
| PIGF1        | 5.82              | 5.16   | 5.45             | 60.52  | 0.807    |
| RANTES       | 17.62             | 8.36   | 22.77            | 18.9   | 0.001    |
| SCF          | 9.52              | 12.13  | 6.51             | 7.49   | 0.199    |
| SDF1a        | 951.75            | 412.62 | 669.5            | 607.62 | 0.011    |
| TNF $\alpha$ | 6.46              | 3.29   | 6.02             | 10.91  | 0.541    |
| VEGFA        | 47.8              | 98.36  | 122.65           | 188.12 | 0.001    |
| VEGFD        | 6.55              | 10.74  | 12.65            | 13.28  | 0.005    |

**Table S1:** Level of cytokine comparing cases and control. They are represented as [median. (interquartile range. IQR)].

| Parameter            | AUC   | <i>p</i> | CI 95%        |
|----------------------|-------|----------|---------------|
| <b>IP-10</b>         | 0.900 | <0.001   | 0.846 – 0.954 |
| <b>D Dimer</b>       | 0.736 | <0.001   | 0.643 – 0.828 |
| <b>SpO2</b>          | 0.289 | <0.001   | 0.195 – 0.382 |
| <b>CRP</b>           | 0.717 | <0.001   | 0.624 – 0.811 |
| <b>Lymphocytes</b>   | 0.300 | <0.001   | 0.202 – 0.398 |
| <b>Procalcitonin</b> | 0.537 | 0.485    | 0.433 – 0.642 |

**Table S2:** Area under the receiver operating characteristic curve (AUROC) analysis of IP-10 compared to other biomarkers.

| a                              | COVID-19    | Non COVID-19 |              |               |
|--------------------------------|-------------|--------------|--------------|---------------|
|                                | 26 patients | 0 patients   | 26 patients  | PPV<br>100%   |
| First PCR SARS-CoV-2: Positive |             |              |              |               |
|                                | 32 patients | 59 patients  | 91 patients  | NPV<br>35.16% |
| First PCR SARS-CoV-2: Negative |             |              |              |               |
|                                | 58 patients | 59 patients  | 117 patients |               |
|                                | Sensitivity | Specificity  |              |               |
|                                | 44.82%      | 100%         |              |               |

  

| b                       | COVID-19    | Non COVID-19 |              |               |
|-------------------------|-------------|--------------|--------------|---------------|
|                         | 50 patients | 11 patients  | 61 patients  | PPV<br>81.96% |
| IP-10 > 173.35<br>pg/mL |             |              |              |               |
|                         | 8 patients  | 48 patients  | 56 patients  | NPV<br>85.71% |
| IP-10 < 173.35<br>pg/mL |             |              |              |               |
|                         | 58 patients | 59 patients  | 117 patients |               |
|                         | Sensitivity | Specificity  |              |               |
|                         | 86.20%      | 81.35%       |              |               |

**Table S3:** Sensitivity and specificity diagnosis of first PCR SARS-CoV-2 (a) and IP-10 cut-off point (b).
